# Supplementary material for: Dioecious hemp (Cannabis sativa L.) plants do not express significant sexually dimorphic morphology in the seedling stage
Source: Sci Rep. 2021 Aug 19;11:16825. doi: 10.1038/s41598-021-96311-w (PMC8376874; doi:10.1038/s41598-021-96311-w)
Supplement: Supplementary file 1 — Supplementary Information 1. [file 41598_2021_96311_MOESM1_ESM.xlsx]

## Sheet: Sheet1
Supplementary Table 1. Data used in the analysis of sex expression and morphology expressed by Week 2 plants.
Plant ID	Genotype	Sex	Epicotyl Length	Hypocotyl Length	Plant Height	Petiole Length
AB000_0206	CFX1	Cosexual	0.9	4.5	5.4	0.5
AB000_0207	CFX1	Male	0.6	11.1	11.7	1.9
AB000_0208	CFX1	Female	0.3	10.8	11.1	1.9
AB000_0214	CFX1	Male	1.2	4.8	6	0.9
AB000_0215	CFX1	Female	0.7	9.3	10	1.6
AB000_0216	CFX1	Male	0.5	8.5	9	0.7
AB000_0218	CFX1	Male	0.5	8.4	8.9	0
AB000_0249	CFX1	Female	1.7	20.3	22	2.6
AB000_0253	CFX1	Cosexual	2.7	15.9	18.6	5.3
AB000_0254	CFX1	Female	1.3	21.9	23.2	4.1
AB000_0255	CFX1	Female	3.4	24.1	27.5	1.1
AB000_0257	CFX1	Female	1.6	19.9	21.5	2.4
AB000_0259	CFX1	Male	4.1	28.1	32.2	2.1
AB000_0261	CFX1	Male	2.6	21	23.6	1.7
AB000_0265	CFX1	Male	4.1	15	19.1	1.5
AB000_0267	CFX1	Female	2.1	21.9	24	3.5
AB000_0270	CFX1	Female	2.6	23.1	25.7	1.4
AB000_0271	CFX1	Male	2.2	13.8	16	3.7
AB000_0275	CFX1	Male	2.8	13.2	16	2.7
AB000_0276	CFX1	Male	2.3	19.3	21.6	2.8
AB000_0279	CFX1	Male	1.9	17.5	19.4	3.1
AB000_0280	CFX1	Female	1.8	18.3	20.1	2.3
AB000_0281	CFX1	Female	0.6	13.4	14	1.3
AB000_0282	CFX1	Female	1.6	24.5	26.1	1.4
AB000_0284	CFX1	Cosexual	1	13.3	14.3	5.3
AB000_0286	CFX1	Male	2.2	20.3	22.5	3.3
AB000_0287	CFX1	Male	3.5	22	25.5	1.9
AB000_0291	CFX1	Female	1.2	12.2	13.4	2.8
AB000_0292	CFX1	Male	1.2	17.6	18.8	2
AB000_0293	CFX1	Male	3.2	12.4	15.6	2.2
AB000_0294	CFX1	Male	4.7	11	15.7	3.1
AB000_0295	CFX1	Female	1.8	22.1	23.9	2.1
AB000_0296	CFX1	Female	3.1	17.5	20.6	2.9
AC000_0203	CFX2	Cosexual	1	9	10	1.3
AC000_0205	CFX2	Cosexual	0.9	6.7	7.6	0.7
AC000_0207	CFX2	Female	0.7	9.2	9.9	1.8
AC000_0208	CFX2	Cosexual	1.4	13.6	15	1.3
AC000_0210	CFX2	Cosexual	1.2	6.6	7.8	0.9
AC000_0212	CFX2	Male	0.8	6.9	7.7	0.8
AC000_0216	CFX2	Male	1.8	8.4	10.2	1.7
AC000_0237	CFX2	Female	0.6	2.4	3	0.1
AC000_0240	CFX2	Male	0.3	4.7	5	0.4
AC000_0247	CFX2	Female	0.6	5.6	6.2	0.6
AC000_0266	CFX2	Male	2.4	30.1	32.5	1.9
AC000_0267	CFX2	Female	2.4	21.4	23.8	2.3
AC000_0269	CFX2	Male	1.6	22.2	23.8	3.2
AC000_0270	CFX2	Female	4	12.7	16.7	1
AC000_0271	CFX2	Male	4.8	17	21.8	1.4
AC000_0275	CFX2	Male	3.5	20.7	24.2	1.5
AC000_0276	CFX2	Male	2.7	19.8	22.5	2.6
AC000_0277	CFX2	Male	2.3	18.4	20.7	3
AC000_0279	CFX2	Female	2	11	13	1
AC000_0281	CFX2	Female	2	16	18	1
AC000_0282	CFX2	Male	1.8	29.7	31.5	0.6
AC000_0283	CFX2	Female	3.8	18.2	22	1.5
AC000_0284	CFX2	Female	2	18.3	20.3	1.7
AC000_0285	CFX2	Male	2.5	17.2	19.7	1.6
AC000_0286	CFX2	Cosexual	2.6	13.4	16	1.2
AC000_0287	CFX2	Male	1.7	16.8	18.5	1.6
AC000_0288	CFX2	Female	1.2	15.8	17	2
AC000_0289	CFX2	Female	3.2	23.8	27	1.3
AC000_0290	CFX2	Male	3.9	20.1	24	0.9
AC000_0291	CFX2	Female	2	14.8	16.8	2.5
AC000_0292	CFX2	Female	2.6	11.4	14	2
AC000_0293	CFX2	Male	1.7	13.3	15	2.2
AC000_0294	CFX2	Male	1.5	36.5	38	1.5
AC000_0295	CFX2	Male	2	15.3	17.3	1
AC000_0296	CFX2	Male	2.5	19.8	22.3	1.2
AC000_0297	CFX2	Female	2.1	14.4	16.5	3.3
AC000_0298	CFX2	Male	3.8	27.2	31	0.8
AC000_0299	CFX2	Male	6.5	22.4	28.9	0.3
AC000_0301	CFX2	Male	4.5	25.1	29.6	1.2
AC000_0302	CFX2	Male	2.2	27.6	29.8	1.2
AC000_0303	CFX2	Male	3.1	23.5	26.6	0.8
AC000_0306	CFX2	Female	2.5	16.5	19	2
AC000_0307	CFX2	Male	3.6	19	22.6	1.6
AC000_0308	CFX2	Female	5.5	17.7	23.2	0.9
AC000_0309	CFX2	Female	3.7	15.6	19.3	0.8
AC000_0310	CFX2	Male	0.8	13.7	14.5	0.5
AC000_0311	CFX2	Cosexual	3.8	15.7	19.5	2
AC000_0312	CFX2	Male	1.3	15.2	16.5	1.3
AC000_0313	CFX2	Female	2.5	15.5	18	1
AC000_0315	CFX2	Female	1.3	12.7	14	3
AC000_0316	CFX2	Female	2.9	15.7	18.6	0.6
AC000_0317	CFX2	Male	3.3	10.5	13.8	2
AC000_0318	CFX2	Male	3.3	18.8	22.1	1.8
AC000_0319	CFX2	Male	2.5	19.8	22.3	1.7
AC000_0320	CFX2	Male	3	22	25	1.5
AC000_0322	CFX2	Cosexual	2.2	17.4	19.6	1.5
AC000_0323	CFX2	Male	2.4	8.6	11	1.8
AC000_0324	CFX2	Female	1.5	14.7	16.2	2.6
AC000_0325	CFX2	Female	2.1	14.4	16.5	3
AC000_0326	CFX2	Male			1	1.4
AC000_0327	CFX2	Female	3.2	24	27.2	1.5
AC000_0328	CFX2	Male	2.2	26.1	28.3	0.7
AC000_0329	CFX2	Female	3	27.2	30.2	1
AC000_0331	CFX2	Female	3.6	13.9	17.5	1.8
AC000_0332	CFX2	Male	3	16	19	1.7
AC000_0333	CFX2	Female	3.7	20.2	23.9	0.9
AC000_0334	CFX2	Female	1.2	12.8	14	1
AC000_0335	CFX2	Male	2.8	33	35.8	1.5
AC000_0336	CFX2	Female	2.1	21.4	23.5	1
AC000_0337	CFX2	Female	2.9	20.3	23.2	1.5
AC000_0341	CFX2	Female	3	17.5	20.5	1.8
AC000_0342	CFX2	Male	2.5	27.6	30.1	1.1
AC000_0343	CFX2	Female	2.3	14.5	16.8	1.7
AC000_0344	CFX2	Female	3	10.8	13.8	2.1
AC000_0346	CFX2	Female	3.1	18.7	21.8	2
AC000_0349	CFX2	Female	1.5	16.3	17.8	1
AC000_0350	CFX2	Female	3.6	15.9	19.5	1
AC000_0351	CFX2	Male	3	15	18	0.4
